# Supplementary material for: Changes in Berry Tissues in Monastrell Grapevines Grafted on Different Rootstocks and Their Relationship with Berry and Wine Phenolic Content
Source: MDPI journal article supplement (doi:10.3390/plants10122585), 2021-11-25
Supplement: s1 [file s1]

## SUPPORTING INFORMATION

**Table S1.** Berry, pulp, skin, and seed parameters evaluated by tasters and the scores given to evaluate the taste and the sensory parameters of Monastrell grapes.

| BERRY            | 1                                         | 2                                      | 3                                                   | 4                                  |
|------------------|-------------------------------------------|----------------------------------------|-----------------------------------------------------|------------------------------------|
| Crushability     | Hard, it breaks only with strong pressure | It deforms, slightly elastic           | It deforms slightly but returns to the initial form | Weak grain                         |
| Easy of peeling  | Strongly adhering pedicel                 | Attached pedicel that comes off easily | Pedicel that comes off relatively easily            | Pedicel that comes off very easily |
| PULP             | 1                                         | 2                                      | 3                                                   | 4                                  |
| Adherence        | Pulp strongly adhering to the skin        | Layer of the attached and visible pulp | Fine stratum of the pulp poorly visible             | No release of juice when chewing   |
| Sweetness        | Little sweetness                          | Moderately sweet                       | Sweet                                               | Very sweet                         |
| Acidity          | Low                                       | Mildly acidic                          | Acidic                                              | Very acidic                        |
| SKIN             | 1                                         | 2                                      | 3                                                   | 4                                  |
| Maceration       | Very hard                                 | Moderately hard                        | Easily crushed                                      | Fragile                            |
| Tannic Intensity | Very low                                  | Quite low                              | Moderately high                                     | High                               |
| Astringency      | Very low                                  | Quite low                              | Moderately low                                      | High                               |
| SEEDS            | 1                                         | 2                                      | 3                                                   | 4                                  |
| Color            | White or greenish-yellow                  | Greenish-brown                         | Dark gray                                           | Dark brown                         |
| Crushability     | Hard                                      | First softness, then hard seed         | It breaks quite easily                              | Fragile and crispy                 |
| Aroma            | Unable to be tasted                       | Green or herbaceous                    | Toasted                                             | Roasted                            |

**Table S2.** The scores obtained in the tasting and sensory analysis of the berries, for five different rootstocks (140Ru, 1103P, 41B, 110R, and 161-49C) and two different irrigation strategies (PRI and RDI), in 2015.

| Strategies (PRD and RDI), in 2019. |     |                                       |         |                     |           |         |                     |                  |             |       |              |       |             |
|------------------------------------|-----|---------------------------------------|---------|---------------------|-----------|---------|---------------------|------------------|-------------|-------|--------------|-------|-------------|
| Rootstock (R)                      |     | Visual/tactile examination of berries |         | Tasting of the pulp |           |         | Tasting of the skin |                  |             | Seeds |              |       | Maturity    |
|                                    |     | Crushability                          | Peeling | Adherence           | Sweetness | Acidity | Maceration          | Tannic intensity | Astringency | Color | Crushability | Aroma | Total Score |
| 140Ru                              |     | 2.2                                   | 2.8     | 2.3                 | 2.5       | 1.7     | 1.7                 | 2.8              | 2.6         | 2.4   | 2.4          | 2.7   | 2.5         |
| 1103P                              |     | 2.8                                   | 2.4     | 2.4                 | 2.2       | 1.5     | 2.1                 | 2.9              | 2.5         | 2.3   | 2.1          | 3.0   | 2.5         |
| 41B                                |     | 2.3                                   | 2.5     | 2.7                 | 2.8       | 1.1     | 2.2                 | 3.1              | 2.8         | 2.4   | 2.2          | 3.0   | 2.7         |
| 110R                               |     | 2.3                                   | 2.5     | 2.4                 | 2.3       | 1.2     | 2.4                 | 2.5              | 2.3         | 3.0   | 2.6          | 3.1   | 2.6         |
| 161-49C                            |     | 2.1                                   | 3.0     | 2.7                 | 2.9       | 1.6     | 2.5                 | 2.5              | 2.4         | 2.5   | 2.1          | 2.7   | 2.5         |
| Irrigation system (IS)             |     |                                       |         |                     |           |         |                     |                  |             |       |              |       |             |
| PRI                                |     | 2.4                                   | 2.7     | 2.4                 | 2.5       | 1.4     | 2.2                 | 2.7              | 2.4         | 2.4   | 2.4          | 2.9   | 2.5         |
| RDI                                |     | 2.3                                   | 2.6     | 2.6                 | 2.6       | 1.4     | 2.2                 | 2.8              | 2.6         | 2.7   | 2.2          | 2.9   | 2.6         |
| R × IS                             |     |                                       |         |                     |           |         |                     |                  |             |       |              |       |             |
| 140RU                              | PRD | 2.0                                   | 2.6     | 2.0a                | 2.6       | 2.0     | 1.6                 | 2.8              | 2.4         | 2.0   | 2.2          | 2.6   | 2.3         |
|                                    | RDI | 2.4                                   | 3.0     | 2.6abc              | 2.4       | 1.4     | 1.8                 | 2.8              | 2.8         | 2.8   | 2.6          | 2.8   | 2.7         |
| 1103P                              | PRD | 2.6                                   | 2.8     | 2.6abc              | 2.0       | 1.4     | 2.0                 | 2.8              | 2.4         | 2.2   | 2.4          | 2.8   | 2.5         |
|                                    | RDI | 3.0                                   | 2.0     | 2.2ab               | 2.4       | 1.6     | 2.2                 | 3.0              | 2.6         | 2.4   | 1.8          | 3.2   | 2.5         |
| 41B                                | PRD | 2.4                                   | 2.6     | 2.8bc               | 2.8       | 1.0     | 2.2                 | 2.8              | 2.8         | 2.6   | 2.6          | 3.0   | 2.7         |
|                                    | RDI | 2.2                                   | 2.4     | 2.6abc              | 2.8       | 1.2     | 2.2                 | 3.4              | 2.8         | 2.2   | 1.8          | 3.0   | 2.6         |
| 110R                               | PRD | 2.4                                   | 2.4     | 2.4ab               | 2.2       | 1.2     | 2.6                 | 2.8              | 2.4         | 2.8   | 2.6          | 3.4   | 2.6         |
|                                    | RDI | 2.2                                   | 2.6     | 2.4ab               | 2.4       | 1.2     | 2.2                 | 2.2              | 2.2         | 3.2   | 2.6          | 2.8   | 2.6         |
| 161-49C                            | PRD | 2.6                                   | 3.0     | 2.2ab               | 3.0       | 1.6     | 2.6                 | 2.2              | 2.0         | 2.2   | 2.0          | 2.8   | 2.5         |
|                                    | RDI | 1.6                                   | 3.0     | 3.2c                | 2.8       | 1.6     | 2.4                 | 2.8              | 2.8         | 2.8   | 2.2          | 2.6   | 2.6         |
| ANOVA                              |     |                                       |         |                     |           |         |                     |                  |             |       |              |       |             |
| R                                  |     | ns                                    | ns      | ns                  | ns        | ns      | ns                  | ns               | ns          | ns    | ns           | ns    | ns          |
| IS                                 |     | ns                                    | ns      | ns                  | ns        | ns      | ns                  | ns               | ns          | ns    | ns           | ns    | ns          |
| R × IS                             |     | ns                                    | ns      | *                   | ns        | ns      | ns                  | ns               | ns          | ns    | ns           | ns    | ns          |

ns, not significant; \* indicates significant differences at the 0.05 level of probability. In each column and for each factor or interaction, different letters indicate significant differences according to Duncan's multiple range test at the 95% confidence level.

**Table S3.** Matrix of Pearson's correlation coefficients obtained between physico-chemical parameters of berry quality and the scores obtained in the tasting and sensory analysis of the berries in 2015.

|                        | Crushability | Peeling | Sweetness | Skin maceration | Tannic intensity | Astringency | Seed Crushability |
|------------------------|--------------|---------|-----------|-----------------|------------------|-------------|-------------------|
| Polyphenols            | 0.30         | -0.19   | 0.31      | 0.78**          | 0.03             | -0.19       | -0.37             |
| EA                     | 0.41         | 0.11    | 0.28      | 0.76*           | -0.49            | -0.67*      | -0.19             |
| TA                     | 0.26         | 0.20    | 0.44      | 0.69*           | -0.56            | -0.70*      | -0.18             |
| Acidity                | 0.32         | -0.03   | -0.69*    | 0.01            | -0.15            | -0.35       | 0.05              |
| Tartaric acid          | -0.18        | 0.76*   | -0.32     | -0.26           | -0.38            | -0.16       | 0.41              |
| Malic acid             | -0.64*       | 0.51    | 0.50      | -0.25           | -0.15            | 0.21        | 0.09              |
| OD <sub>520</sub>      | 0.39         | -0.15   | -0.79**   | -0.27           | 0.18             | -0.13       | 0.17              |
| IC                     | 0.35         | -0.18   | -0.73*    | -0.26           | 0.25             | -0.08       | 0.10              |
| Tone                   | -0.40        | 0.23    | 0.80**    | 0.39            | -0.21            | 0.01        | -0.36             |
| QI <sub>total</sub>    | 0.00         | 0.41    | 0.45      | 0.50            | -0.45            | -0.58       | -0.40             |
| QI <sub>technol</sub>  | -0.28        | 0.57    | 0.54      | 0.39            | -0.47            | -0.45       | -0.26             |
| QI <sub>phenolic</sub> | 0.35         | 0.11    | 0.25      | 0.55            | -0.34            | -0.65*      | -0.52             |
| Amino acids            | -0.37        | 0.67*   | 0.15      | 0.34            | -0.70*           | -0.49       | 0.17              |
| Resveratrol            | -0.39        | 0.59    | 0.55      | 0.42            | -0.65*           | -0.30       | 0.11              |
| Glucose                | -0.02        | -0.08   | 0.48      | 0.69*           | 0.05             | -0.25       | -0.70*            |
| Fructose               | -0.08        | 0.04    | 0.48      | 0.69*           | 0.00             | -0.29       | -0.63             |
| G+F+S                  | -0.05        | -0.02   | 0.48      | 0.69*           | 0.03             | -0.27       | -0.66*            |

\* and \*\* indicate significant differences at the 0.05 and 0.01 levels of probability, respectively.
